# Supplementary material for: Identification of a novel chemokine-dependent molecular mechanism underlying rheumatoid arthritis-associated autoantibody-mediated bone loss
Source: HighWire-hosted journal article supplement (doi:10.1136/annrheumdis-2015-208093), 2015-11-27

Supplementary Figures:

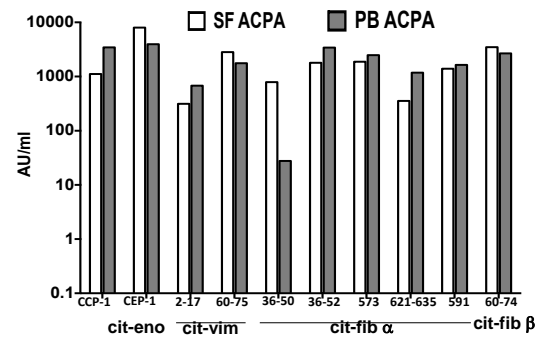

Multiplex chip-based assay results showing that PB and SF ACPA pools contain a wide spectrum of human ACPAs with reactivity against multiple citrullinated targets; values are expressed as arbitrary units/ml.

Supplemental figure 2. Monoclonal RF IgG has no effect on osteoclastogenesis

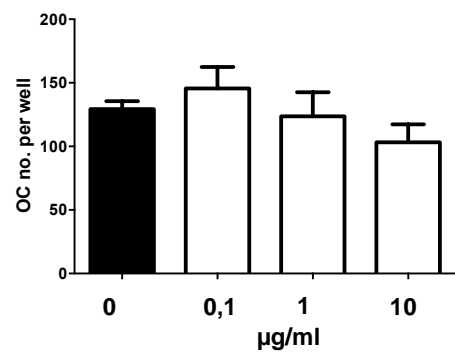

Fab fragments of the monoclonals increase IL-8 release in OC supernatants

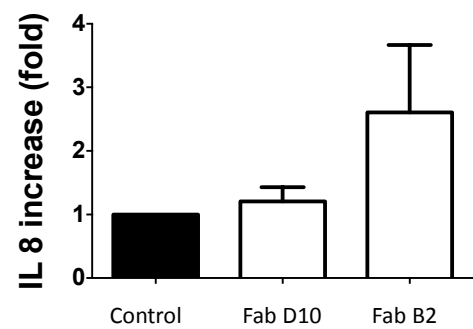

Supplement: annrheumdis-2015-208093supp.pdf [file annrheumdis-2015-208093supp.pdf]
